# Supplementary material for: Segmented polymer nanowires and nanorods by one-step template wetting with a hyperbranched polymer and linear polymer blend
Source: Royal Society of Chemistry journal article supplement (doi:10.1039/c4ra09155h), 2014-10-06
Supplement: c4ra09155h1.pdf [file c4ra09155h1.pdf]

## Supporting Information

# Segmented polymer nanowires and nanorods by one-step template wetting with hyperbranched polymer and linear polymer blend

*Wei Tian,<sup>\*,a</sup> Longbiao Huang,<sup>b</sup> Duyang Zang,<sup>a</sup> Chao Li,<sup>a</sup> Jing Dang,<sup>a</sup> and Dawei Wang<sup>\*,c</sup>*

<sup>a</sup>The Key Laboratory of Space Applied Physics and Chemistry, Ministry of Education and Shaanxi Key Laboratory of Macromolecular Science and Technology, School of Science, Northwestern Polytechnical University, Xi'an, 710072, P. R. China

<sup>b</sup>Department of Industrial and Systems Engineering, The Hong Kong Polytechnic University, Hung Hom, Kowloon, Hong Kong, P. R. China

<sup>c</sup>Lehn Institute of Functional Materials, School of Chemistry and Chemical Engineering, Sun Yat-Sen University, Guangzhou 510275, P. R. China

\*E-Mail: happytw\_3000@nwpu.edu.cn or wdawei@mail.sysu.edu.cn

**Scheme S1.** Model polymers used in fabrication: (a) Ideal chemical structure of HBP-64-OH in Ref. S1;

(b) Synthetic routes of L-PMMA

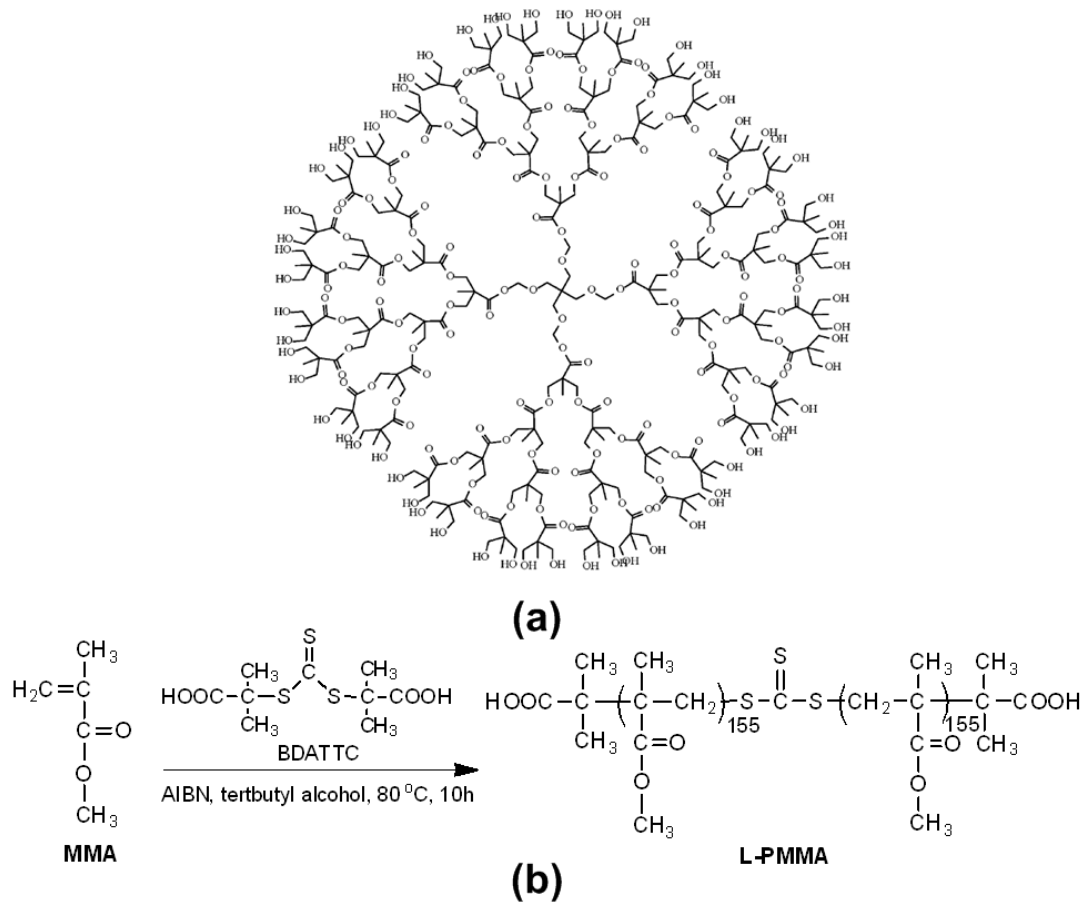

## REFERENCES

(S1) Xu J.; Luo S. Z.; Shi W. F.; Liu S. Y. *Langmuir*, **2006**, 22, 989-997.
